# Supplementary material for: Biocatalytic ketone reductions using Biobeads for miniaturized high throughput experimentation
Source: Royal Society of Chemistry journal article supplement (doi:10.1039/d0nj04889e), 2020-12-15
Supplement: d0nj04889e2.pdf [file d0nj04889e2.pdf]

Supporting Information

**Biocatalytic ketone reductions using BioBeads for miniaturized high throughput experimentation**

Jia Shen Chew, Thi Thanh Nha Ho and Chi-Lik Ken Lee\*

\*Corresponding author's email: ken.lee@ntu.edu.sg

Contents

|          |                                                                                                     |
|----------|-----------------------------------------------------------------------------------------------------|
| Page S2  | General Information                                                                                 |
| Page S3  | General Procedures to Racemic <b>2</b> , <b>4</b> , <b>6</b>                                        |
| Page S5  | Preparation of BioBeads                                                                             |
| Page S7  | General Procedures for Bioreduction of ketones using BioBeads with Kred 1-24 at analytical scale    |
| Page S7  | General Procedures for Bioreduction of <b>1</b> using BioBeads with Kred 1-24 at miniaturized scale |
| Page S8  | Bioreduction of <b>1</b> comparing native Kred and BioBeads at analytical scale                     |
| Page S9  | Bioreduction of <b>3</b> comparing native Kred and Biobeads at analytical scale                     |
| Page S10 | Bioreduction of <b>1</b> comparing native and BioBeads at miniaturized scale                        |
| Page S11 | Bioreduction of <b>5</b> comparing native and BioBeads at miniaturized scale                        |
| Page S12 | Appendix: <sup>1</sup> HNMR and <sup>13</sup> CNMR of <b>2</b>                                      |
| Page S13 | Appendix: <sup>1</sup> HNMR and <sup>13</sup> CNMR of <b>4</b>                                      |
| Page S14 | Appendix: <sup>1</sup> HNMR and <sup>13</sup> CNMR of <b>6</b>                                      |
| Page S15 | Appendix: HPLC profiles of selected bioreductions of acetophenone <b>1</b>                          |
| Page S16 | References                                                                                          |

## General Information

Ketoreductases (Kred) and other corresponding reagents were purchased from Codexis. Native reactions were carried out as stated by procedures from Codexis Screening Kit<sup>1</sup> and the respective Kred Recycled Mix P and N prepared fresh on the day of use. Polystyrene beads (35-45 mesh size) were coated with the respective reagents (1) Kred, (2) Mix P or Mix N which contains  $\beta$ -NADP-Na<sub>2</sub> or  $\beta$ -NAD-Na<sub>2</sub>, the necessary buffer reagents and glucose/glucose dehydrogenase co-factor recycling reagent), according to the ratios similar for native reactions. Reactions performed with BioBeads only required the subsequent addition of deionised (DI) water, isopropanol (IPA) and the carbonyl substrate. The preparation methods for BioBeads were similar to ChemBeads.<sup>2,3</sup> For the enzymatic reactions, commercially available solvents were used. Reagents were of analytical grade, obtained from commercial suppliers and used without further purification. <sup>1</sup>H NMR and <sup>13</sup>C NMR were recorded on Bruker Avance III 400 MHz BBFO1 spectrometer at 25°C. CDCl<sub>3</sub> was used as solvent with internal reference SiMe<sub>4</sub>. Chemical shifts for <sup>1</sup>H and <sup>13</sup>C NMR spectra were recorded as  $\delta$  in units of parts per million (ppm) downfield from SiMe<sub>4</sub> ( $\delta$  0.0) and relative to the signal of chloroform-*d* ( $\delta$  77.03) respectively. Multiplicities were given as: s (singlet), d (doublet), q (quartet), or m (multiplets). The number of protons (n) for a given resonance was indicated by nH. Mass spectra (MS) were obtained on the ThermoFinnigan LCQ Fleet mass spectrometer. MS were reported in units of mass to charge ratio (m/z). The conversion yields (% conversion) and enantiomeric excess (% ee) were determined by high performance liquid chromatography (HPLC) analysis using Shimadzu LC-20AT and LC-2010CHT HPLC workstations with either Chiralcel OD-H or Chiralpak IB or Chiralcel OJ-H columns). Confirmation of *R* and *S* enantiomers were determined by comparing the retention times (*t*<sub>R</sub>) against previous reports.<sup>4-8</sup> Flash chromatography separations were performed on Merck 60 (0.040 - 0.063mm) mesh silica gel. Analytical thin-layer chromatography (TLC) was performed on Merck 60 F<sub>254</sub> silica gel plates. Visualization was performed using a UV lamp.

## General Procedures to Racemic **2**, **4**, **6**

To a 4 mL vial containing a solution of ketone (25 mg, 1 eqv) in THF (1 mL) at 0°C was added NaBH<sub>4</sub> (2 eqv) in portions followed by cold MeOH (1 mL). The reaction was stirred at room temperature for 1 hr. After the completion of the reaction by TLC, saturated brine (2 mL) was added and the mixture was extracted with ethyl acetate (2 × 1 mL) before being further washed with H<sub>2</sub>O (2 × 1 mL). The organic layer was concentrated in *vacuo* and purified by silica gel chromatography.

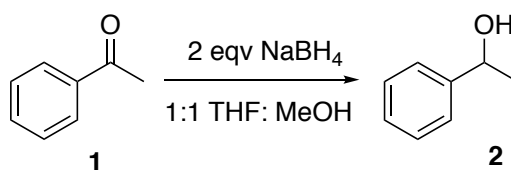

(±)-1-phenylethanol-1-ol, **2**. Colourless oil (16.5 mg, 65% yield). <sup>1</sup>H NMR (400 MHz, CDCl<sub>3</sub>): δ 7.36-7.21 (m, 5H), 5.01 – 4.79 (q, *J* = 8 Hz, 1H), 2.04 (s, 1H), 1.49 (d, *J* = 8 Hz, 3H). <sup>13</sup>C NMR (100 MHz, CDCl<sub>3</sub>): 145.91, 128.59, 127.56, 125.48, 70.49, 25.23. MS (ESI): Found *m/z* 104.90. Calcd for C<sub>8</sub>H<sub>8</sub> [M-H<sub>2</sub>O] = 104.15. HPLC analysis: Chiralcel OD-H column; Hex:IPA = 90:10; 1.0 mL/min; 210 nm; 23°C; *t<sub>R</sub>* of *R* isomer = 5.96 min; *t<sub>R</sub>* of *S* isomer = 6.69 min. Previous reports<sup>4,5,7</sup>: Chiralcel OD-H column; Hex:IPA = 98:2; 1.0 mL/min; *t<sub>R</sub>* of *R* isomer = 15.31 min; *t<sub>R</sub>* of *S* isomer = 19.87 min.

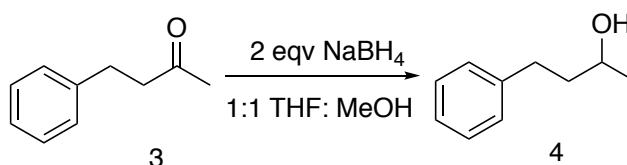

(±)-4-phenylbutan-2-ol, **4**. Colourless Oil (22.3 mg, 88% yield) <sup>1</sup>H NMR (400 MHz, CDCl<sub>3</sub>): δ 7.35-7.22 (m, 5H), 3.87 (m, 1H), 2.85-2.68 (m, 2H), 1.86-1.80 (m, 2H), 1.28-1.27 (d, 3H). <sup>13</sup>C NMR (100 MHz, CDCl<sub>3</sub>): 142.11, 128.43, 125.84, 67.50, 40.88, 32.17, 23.63. MS (ESI): Found *m/z* 134.72. Calcd for C<sub>10</sub>H<sub>14</sub> [M-H<sub>2</sub>O] = 134.22. HPLC analysis: Chiralpak IB column; Hex:IPA = 95:5; 0.8 mL/min; 210 nm; 23°C; *t<sub>R</sub>* of *R* isomer = 8.51 min; *t<sub>R</sub>* of *S* isomer = 10.8 min. Previous reports<sup>6</sup>: Chiralpak IB column; Hex:IPA = 95:5; 0.8 mL/min; *t<sub>R</sub>* of *R* isomer = 8.9 min; *t<sub>R</sub>* of *S* isomer = 10.9 min.

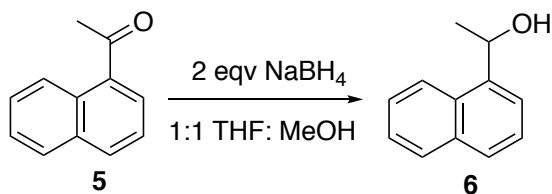

(±)-1-(naphthalen-1-yl)ethan-1-ol, **6**. Colourless Oil (18.2 mg, 72% yield)  $^1\text{H}$  NMR (400 MHz,  $\text{CDCl}_3$ ):  $\delta$  8.27-7.96 (m, 1H), 7.96 – 7.82 (m, 1H), 7.78 (d,  $J = 8.1$  Hz, 1H), 7.66 (d,  $J = 7.1$  Hz, 1H), 7.59 – 7.37 (m, 3H), 5.62 (q,  $J = 6.4$  Hz, 1H), 2.49 (s, 1H), 1.69 (d,  $J = 6.4$  Hz, 3H).  $^{13}\text{C}$  NMR (100 MHz,  $\text{CDCl}_3$ ):  $\delta$  141.46, 133.86, 130.34, 128.94, 127.93, 126.06, 125.59, 123.25, 122.07, 67.06, 24.40. MS (ESI) Found  $m/z$  154.90. Calcd for  $\text{C}_{12}\text{H}_{10}$  [M-H<sub>2</sub>O] 154.21. HPLC analysis: Chiralcel OJ-H; Hex:IPA = 90:10; 1.0 mL/min; 215 nm; 23 °C;  $t_R$  of *S* isomer = 11.80 min,  $t_R$  of *R* isomer = 16.35 min. Previous reports<sup>7,8</sup>: Chiralcel OD-H column; Hex:IPA = 90:10; 1.0 mL/min;  $t_R$  of *S* isomer = 9.47 min;  $t_R$  of *R* isomer = 14.26 min.

## Preparation of BioBeads

General Coating procedure:

(For Kreds 1-19)

In a 20 mL vial were added 6.70 g of polystyrene beads, followed by the addition of 250 mg Kred powder, 410 mg of Mix P powder. An additional 6.70 g of polystyrene beads was added to cover the solid reagent layer, sandwiching the solid reagents between the two layers of polystyrene beads. The mixture was then placed inside a Resodyn Acoustic Mixer (RAM, 500 g capacity, Resodyn) and mixed for 15 min with a mechanical driver magnitude of 40–45 times the acceleration of gravity. The oscillation frequency was optimized by the RAM driver control module to mix the powder at resonance 5 frequency. After mixing, no loose powders were observed in the 20 mL vial. The bead loading was thus estimated to be 1.78% Kred and 2.92% Mix P. The stoichiometries of Kred and Mix P for miniaturized reactions were calculated based on this bead loading.

General Coating procedure:

(For Kreds 20-24)

In a 20 mL vial were added 6.28 g of polystyrene beads, followed by the addition of 250 mg Kred powder, 1250 mg of Mix N powder. An additional 6.28 g of polystyrene beads was added to cover the solid reagent layer, sandwiching the solid reagents between the two layers of polystyrene beads. The mixture was then placed inside a Resodyn Acoustic Mixer (RAM, 500 g capacity, Resodyn) and mixed for 15 min with a mechanical driver magnitude of 40–45 times the acceleration of gravity. The oscillation frequency was optimized by the RAM driver control module to mix the powder at resonance 5 frequency. After mixing, no loose powders were observed in the 20 mL vial. The bead loading was thus estimated to be 1.78% Kred and 8.89% Mix N. The stoichiometries of Kred and Mix N for miniaturized reactions were calculated based on this bead loading.

**Procedures for Bioreduction of ketones using native Kred 1-24 at analytical scale (Adopted from Codexis Screening Protocol)**

*(For entries 1-19: screening procedure P was adopted)* In each 4 mL vial, was added 10 mg of the respective native Kred. 0.6 g Kred Recycle Mix P was added to 33 mL of DI water to give the reconstituted Kred recycle mix P in the right concentration (The reconstituted Kred recycled Mix P contained 128 mM Na<sub>3</sub>PO<sub>4</sub>, 1.7 mM MgSO<sub>4</sub>, 1.1 mM NADP<sup>+</sup>, pH 7.0). 0.9 mL of Kred Recycle Mix P solution was added into each vial. 1 mmol of the respective ketones was added to 4 mL of IPA for the preparation of substrate stock solution, whereby 0.1 mL was added into each reaction vial together with 0.05 mL THF. The reaction vials were left to shake at 30°C for 48 hr. Then the mixture was extracted with ethyl acetate (2 × 1 mL), and passed through a microcolumn. The organic layer was dried over Na<sub>2</sub>SO<sub>4</sub>, evaporated in *vacuo*, and injected into HPLC to determine the % conversion and % *ee*.

*(For entries 20-24: screening procedure N was adopted)* In each 4 mL vial, was added 10 mg of the respective native Kred. 0.3 g Kred Recycle Mix N was added to 6 mL of DI water to give the reconstituted Kred Recycle Mix N in the right concentration (The reconstituted Kred recycled Mix N contained 263 mM Na<sub>3</sub>PO<sub>4</sub>, 1.7 mM MgSO<sub>4</sub>, 1.1 mM NADP<sup>+</sup>, 1.1mM NAD<sup>+</sup>, 80 mM D-glucose, 4.3 Unit/mL glucose dehydrogenase, pH 7.0). 0.3 mmol of the respective ketone was added to the reconstituted Kred Recycle Mix N solution and stirred thoroughly before 1 mL of this solution was added to each 4 mL vial containing the respective Kred. 0.1 mL of IPA and 0.05 mL THF were subsequently added and the reaction vials were left to shake at 30°C for 48 hr. Then the mixture was extracted with ethyl acetate (2 × 1 mL), and passed through a microcolumn. The organic layer was dried over Na<sub>2</sub>SO<sub>4</sub>, evaporated in *vacuo*, and injected into HPLC to determine the % conversion and % *ee*.

### **General Procedures for Bioreduction of ketones using BioBeads with Kred 1-24 at analytical scale**

In each 4.0 mL vials was added 562 mg of the respective BioBeads (10 mg Kred), followed by 0.9 mL of DI water. 1 mmol of ketone was added to 4 mL of IPA for the preparation of substrate stock solution, where 0.1 mL of the eventual stock solution was added into each reaction vial, followed by 0.05 mL of THF. The reaction vials were agitated on the Torrey Pines orbital shaker at 30°C for 48 hr. The mixture was extracted with ethyl acetate (2×1 mL), and passed through a microcolumn. The organic layer was dried over Na<sub>2</sub>SO<sub>4</sub>, evaporated in *vacuo*, and injected into HPLC to determine the % conversion and % *ee*.

**Procedures for Bioreduction of 1 using BioBeads with Kred 1-24 at miniaturized scale** In each 2.0 mL Eppendorf tube, was added 2 mg of the respective BioBeads (0.036 mg Kred), followed by 16.2 μL of DI water. 1.07 mg (1.03 μL) of acetophenone **1** was added to 35.6 μL of IPA for the preparation of substrate stock solution, where 0.9 μL of the eventual stock solution was added into each reaction tube. An additional 0.9 μL of IPA and 0.1 μL of THF was added and the reaction tubes were agitated on the Torrey Pines orbital shaker at 30°C for 48 hr. Then the mixture was extracted with ethyl acetate (2× 20 μL), combined and dried over Na<sub>2</sub>SO<sub>4</sub>. The organic contents were evaporated in *vacuo*, and injected into HPLC to determine the % conversion and % *ee*.

**Procedures for Bioreduction of 5 using BioBeads with Kred 1-24 at miniaturized scale**<sup>8</sup> In each 2.0 mL Eppendorf tube, was added 2 mg of the respective BioBeads (0.036 mg Kred), followed by 16.2 μL of DI water. 1.51 mg (1.35 μL) of 1-(naphthalen-1-yl)ethan-1-one **5** was added to 35.6 μL of IPA for the preparation of substrate stock solution, where 0.36 μL of the IPA-substrate stock solution was added into the reaction tube followed by the subsequent addition of 2.6 μL of IPA and 1 μL DMSO. The reaction tubes were agitated on the Torrey Pines orbital shaker at 30°C for 24 hr. Then the mixture was extracted with ethyl acetate (2×20 μL), combined and dried over Na<sub>2</sub>SO<sub>4</sub>. The organic contents were evaporated in *vacuo*, and injected into HPLC to determine the % conversion and % *ee*.

**Bioreduction of **1** comparing native Kred and BioBeads at analytical scale**

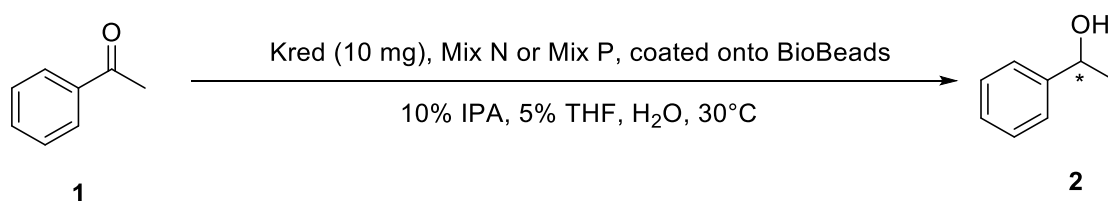

**Table 1. Comparison of BioBeads and native reactions with acetophenone **1** as substrate.**

| Entry <sup>[a]</sup> | Kred   | C(%) <sup>[b]</sup> | ee (%) <sup>[b]</sup> | Entry <sup>[a]</sup> | Kred     | C(%) <sup>[b]</sup> | ee (%) <sup>[b]</sup> |
|----------------------|--------|---------------------|-----------------------|----------------------|----------|---------------------|-----------------------|
| 1                    | P1-A04 | >99(91)             | >99(93)               | 13                   | P2-D11   | 98(98)              | -1(-22)               |
| 2                    | P1-A12 | 96(91)              | >99(69)               | 14                   | P2-D12   | 92(96)              | 18(-2)                |
| 3                    | P1-B02 | 98(96)              | 4(-2)                 | 15                   | P2-G03   | 95(95)              | 77(18)                |
| 4                    | P1-B05 | 98(98)              | -6(-2)                | 16                   | P2-H07   | 98(91)              | >99(72)               |
| 5                    | P1-B10 | 98(95)              | 1(-3)                 | 17                   | P3-B03   | 98(96)              | 1(-32)                |
| 6                    | P1-B12 | 98(96)              | 33(-3)                | 18                   | P3-G09   | 72(96)              | 6(-8)                 |
| 7                    | P1-C01 | 96(98)              | -3(1)                 | 19                   | P3-H12   | 96(95)              | -15(-45)              |
| 8                    | P1-H08 | 98(96)              | -24(-4)               | 20                   | 101      | 99(93)              | 53(25)                |
| 9                    | P2-B02 | 98(98)              | -26(-1)               | 21                   | 119      | 94(96)              | -99(-99)              |
| 10                   | P2-C02 | 98(97)              | -10(-3)               | 22                   | 130      | 93(87)              | -99(-92)              |
| 11                   | P2-C11 | 94(98)              | 41(26)                | 23                   | NADH-101 | 93(97)              | 25(16)                |
| 12                   | P2-D03 | 98(96)              | 41(-1)                | 24                   | NADH-110 | 90(94)              | 93(80)                |

<sup>[a]</sup>Reaction conditions: For entries 1-19, Mix P [128 mM Na<sub>3</sub>PO<sub>4</sub>, 1.7 mM MgSO<sub>4</sub>, 1.1 mM NADP<sup>+</sup>], pH 7.0. Entries 20-24: identical conditions but using Mix N [263 mM Na<sub>3</sub>PO<sub>4</sub>, 1.7 mM MgSO<sub>4</sub>, 1.1 mM NADP<sup>+</sup>, 1.1 mM NAD<sup>+</sup>, 80 mM D-glucose and 10 Unit/mL glucose dehydrogenase], pH 7.0. Kred (10 mg), DI water (0.9 mL), IPA (0.1 mL), tetrahydrofuran (0.05 mL), 48 hr at 30°C. <sup>[b]</sup>Determined by HPLC: numbers inside parentheses represent results from native Kred; numbers outside parentheses represent results with BioBeads; positive and negative % ee values indicate *R* and *S* enantiomers respectively.



Bioreduction of **3** comparing native Kred and BioBeads at analytical scale

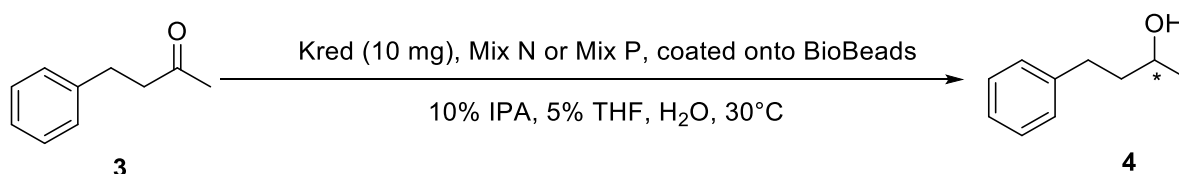

Table 2. Comparison of BioBeads and native reactions with 4-phenylbutan-2-one **3** as substrate.

| Entry <sup>[a]</sup> | Kred   | C(%) <sup>[b]</sup> | ee (%) <sup>[b]</sup> | Entry <sup>[a]</sup> | Kred     | C(%) <sup>[b]</sup> | ee (%) <sup>[b]</sup> |
|----------------------|--------|---------------------|-----------------------|----------------------|----------|---------------------|-----------------------|
| 1                    | P1-A04 | 96(96)              | 98(91)                | 13                   | P2-D11   | 98(99)              | 54(7)                 |
| 2                    | P1-A12 | 96(96)              | 98(83)                | 14                   | P2-D12   | 98(99)              | 9(-2)                 |
| 3                    | P1-B02 | 94(98)              | 96(38)                | 15                   | P2-G03   | 96(98)              | 73(52)                |
| 4                    | P1-B05 | 95(99)              | 98(58)                | 16                   | P2-H07   | 98(97)              | -20(-2)               |
| 5                    | P1-B10 | 98(97)              | 99(92)                | 17                   | P3-B03   | 98(99)              | -2(-18)               |
| 6                    | P1-B12 | 98(96)              | 33(85)                | 18                   | P3-G09   | 96(98)              | -71(-73)              |
| 7                    | P1-C01 | 99(99)              | -1(-2)                | 19                   | P3-H12   | 99(99)              | -5(-6)                |
| 8                    | P1-H08 | 98(99)              | 62(3)                 | 20                   | 101      | 88(60)              | -25(-58)              |
| 9                    | P2-B02 | 98(99)              | -3(-2)                | 21                   | 119      | 51(40)              | -25(8)                |
| 10                   | P2-C02 | 98(99)              | -6(-2)                | 22                   | 130      | 99(58)              | -3(34)                |
| 11                   | P2-C11 | 97(97)              | 80(74)                | 23                   | NADH-101 | 99(58)              | -99(-97)              |
| 12                   | P2-D03 | 97(99)              | 18(-1)                | 24                   | NADH-110 | 97(97)              | 64(59)                |

<sup>[a]</sup>Reaction conditions: For entries 1-19, Mix P [128 mM Na<sub>3</sub>PO<sub>4</sub>, 1.7 mM MgSO<sub>4</sub>, 1.1 mM NADP<sup>+</sup>], pH 7.0. Entries 20-24: identical conditions but using Mix N [263 mM Na<sub>3</sub>PO<sub>4</sub>, 1.7 mM MgSO<sub>4</sub>, 1.1 mM NADP<sup>+</sup>, 1.1 mM NAD<sup>+</sup>, 80 mM D-glucose and 10 Unit/mL glucose dehydrogenase], pH 7.0. Kred (10 mg), DI water (0.9 mL), IPA (0.1 mL), tetrahydrofuran (0.05 mL), 48 hr at 30°C. <sup>[b]</sup>Determined by HPLC: numbers inside parentheses represent results from native Kred; numbers outside parentheses represent results with BioBeads; positive and negative % ee values indicate *R* and *S* enantiomers respectively

### Bioreduction of **1** comparing native and BioBeads at miniaturized scale

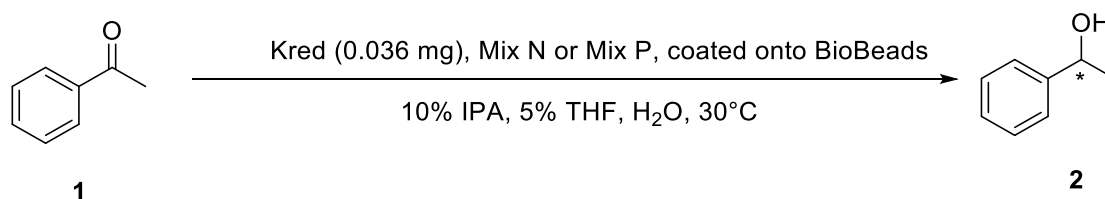

**Table 3. Comparison of miniaturized BioBeads reaction with native reaction with acetophenone **1** as substrate**

| Entry <sup>[a]</sup> | Kred   | C(%) <sup>[b]</sup> | ee (%) <sup>[b]</sup> | Entry <sup>[a]</sup> | Kred     | C(%) <sup>[b]</sup> | ee (%) <sup>[b]</sup> |
|----------------------|--------|---------------------|-----------------------|----------------------|----------|---------------------|-----------------------|
| 1                    | P1-A04 | >99(90)             | >99(>99)              | 13                   | P2-D11   | 97(98)              | -1(30)                |
| 2                    | P1-A12 | 96(90)              | >99(98)               | 14                   | P2-D12   | 92(89)              | 18(14)                |
| 3                    | P1-B02 | 98(>99)             | 4(28)                 | 15                   | P2-G03   | 95(98)              | 77(85)                |
| 4                    | P1-B05 | 98(82)              | -6(-14)               | 16                   | P2-H07   | 98(87)              | >99(74)               |
| 5                    | P1-B10 | 98(92)              | 1(9)                  | 17                   | P3-B03   | 98(98)              | 1(3)                  |
| 6                    | P1-B12 | 97(97)              | 33(69)                | 18                   | P3-G09   | 72(61)              | 6(24)                 |
| 7                    | P1-C01 | 96(69)              | -3(37)                | 19                   | P3-H12   | 96(97)              | -15(-9)               |
| 8                    | P1-H08 | 98(97)              | -24(-10)              | 20                   | 101      | 99(99)              | 53(39)                |
| 9                    | P2-B02 | 98(90)              | -26(-13)              | 21                   | 119      | 94(77)              | -99(-40)              |
| 10                   | P2-C02 | 98(96)              | -10(-7)               | 22                   | 130      | 93(96)              | -99(-99)              |
| 11                   | P2-C11 | 94(88)              | 41(66)                | 23                   | NADH-101 | 93(99)              | 25(23)                |
| 12                   | P2-D03 | 98(57)              | 41(50)                | 24                   | NADH-110 | 94(>99)             | >99(61)               |

<sup>[a]</sup>Reaction conditions: For entries 1-19, Mix P [128 mM Na<sub>3</sub>PO<sub>4</sub>, 1.7 mM MgSO<sub>4</sub>, 1.1 mM NADP<sup>+</sup>], pH 7.0. Entries 20-24, identical conditions but using Mix N [263 mM Na<sub>3</sub>PO<sub>4</sub>, 1.7 mM MgSO<sub>4</sub>, 1.1 mM NADP<sup>+</sup>, 1.1 mM NAD<sup>+</sup>, 80 mM D-glucose and 10 Unit/mL glucose dehydrogenase], pH 7.0. Kred, DI water (100 μL), IPA (0.89 μL), tetrahydrofuran (0.5 μL), 48 hr at 30°C. <sup>[b]</sup>Determined by HPLC: numbers inside parentheses represent results from BioBeads (0.036 mg Kred); numbers outside parentheses represent results from BioBeads (10 mg Kred); positive and negative % ee values indicate *R* and *S* enantiomers respectively.

Bioreduction of 5 comparing native and BioBeads at miniaturized scale

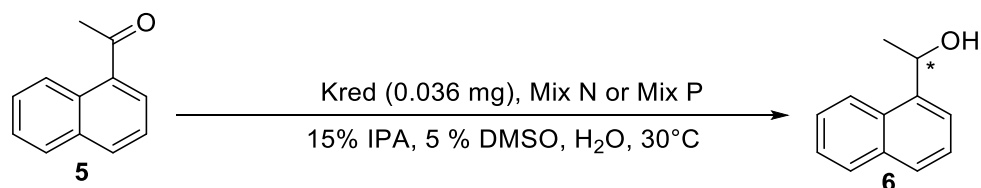

Table 4. Comparison of miniaturised BioBeads with results from Berglund *et. al* with 1-(naphthalen-1-yl)ethan-1-one 5 as the substrate.

| Entry <sup>[a]</sup> | Kred   | C(%)[ <sup>a]</sup> | ee (%)[ <sup>a]</sup> | Entry <sup>[a]</sup> | Kred     | C(%)[ <sup>a]</sup> | ee (%)[ <sup>a]</sup> |
|----------------------|--------|---------------------|-----------------------|----------------------|----------|---------------------|-----------------------|
| 1                    | P1-A04 | 13(14)              | -84(-70)              | 13                   | P2-D11   | 90(99)              | 99(99)                |
| 2                    | P1-A12 | 3(37)               | -2(-14)               | 14                   | P2-D12   | 69(99)              | 78(70)                |
| 3                    | P1-B02 | 97(99)              | -99(-93)              | 15                   | P2-G03   | 50(99)              | -74(-60)              |
| 4                    | P1-B05 | 30(17)              | 78(72)                | 16                   | P2-H07   | 33(30)              | -70(-72)              |
| 5                    | P1-B10 | 94(99)              | -99(-90)              | 17                   | P3-B03   | 95(99)              | 99(99)                |
| 6                    | P1-B12 | 98(99)              | -99(-90)              | 18                   | P3-G09   | 8(8)                | 66(-)                 |
| 7                    | P1-C01 | 79(99)              | 39(80)                | 19                   | P3-H12   | 95(99)              | 83(68)                |
| 8                    | P1-H08 | 53(43)              | 80(80)                | 20                   | 101      | 23(17)              | -99(-99)              |
| 9                    | P2-B02 | 79(99)              | 63(70)                | 21                   | 119      | 31(13)              | 69(99)                |
| 10                   | P2-C02 | 54(99)              | 60(51)                | 22                   | 130      | 3(0)                | -4(-)                 |
| 11                   | P2-C11 | 0(0)                | -(-)                  | 23                   | NADH-101 | 78(77)              | -5(99)                |
| 12                   | P2-D03 | 62(99)              | -80(-45)              | 24                   | NADH-110 | 99(99)              | -98(-99)              |

<sup>[a]</sup>Reaction conditions: For entries 1-19, Mix P [128 mM Na<sub>3</sub>PO<sub>4</sub>, 1.7 mM MgSO<sub>4</sub>, 1.1 mM NADP<sup>+</sup>], pH 7.0. Entries 20-24, identical conditions but using Mix N [263 mM Na<sub>3</sub>PO<sub>4</sub>, 1.7 mM MgSO<sub>4</sub>, 1.1 mM NADP<sup>+</sup>, 1.1 mM NAD<sup>+</sup>, 80 mM D-glucose, 10 Unit/mL Glucose dehydrogenase], pH 7.0. Kred, DI water (16.2 μL), IPA (3 μL), dimethyl sulfoxide (1 μL), 24 hr at 30°C. <sup>[b]</sup>Determined by HPLC: numbers outside parentheses represent results from BioBeads (0.036 mg Kred); numbers inside parentheses represent results by Berglund *et al*<sup>8</sup>; positive and negative % ee values indicate *S* and *R* enantiomers respectively.

# Appendix: $^1\text{H}$ NMR and $^{13}\text{C}$ NMR of **2**

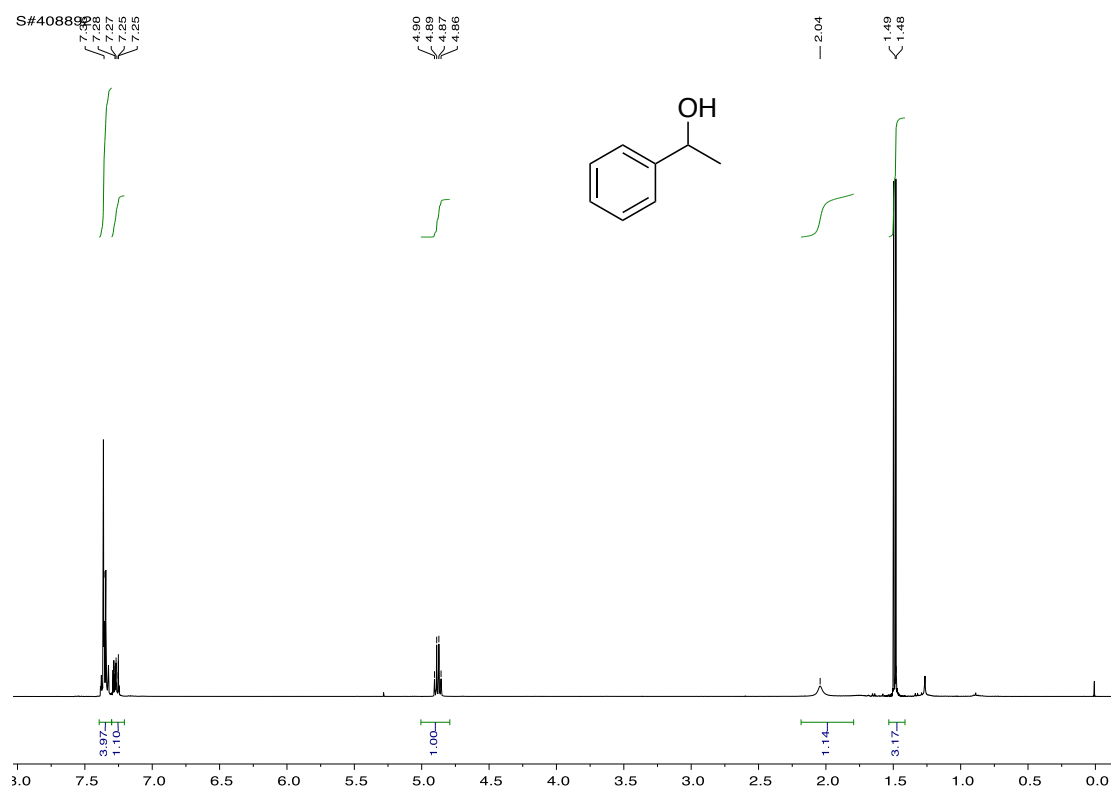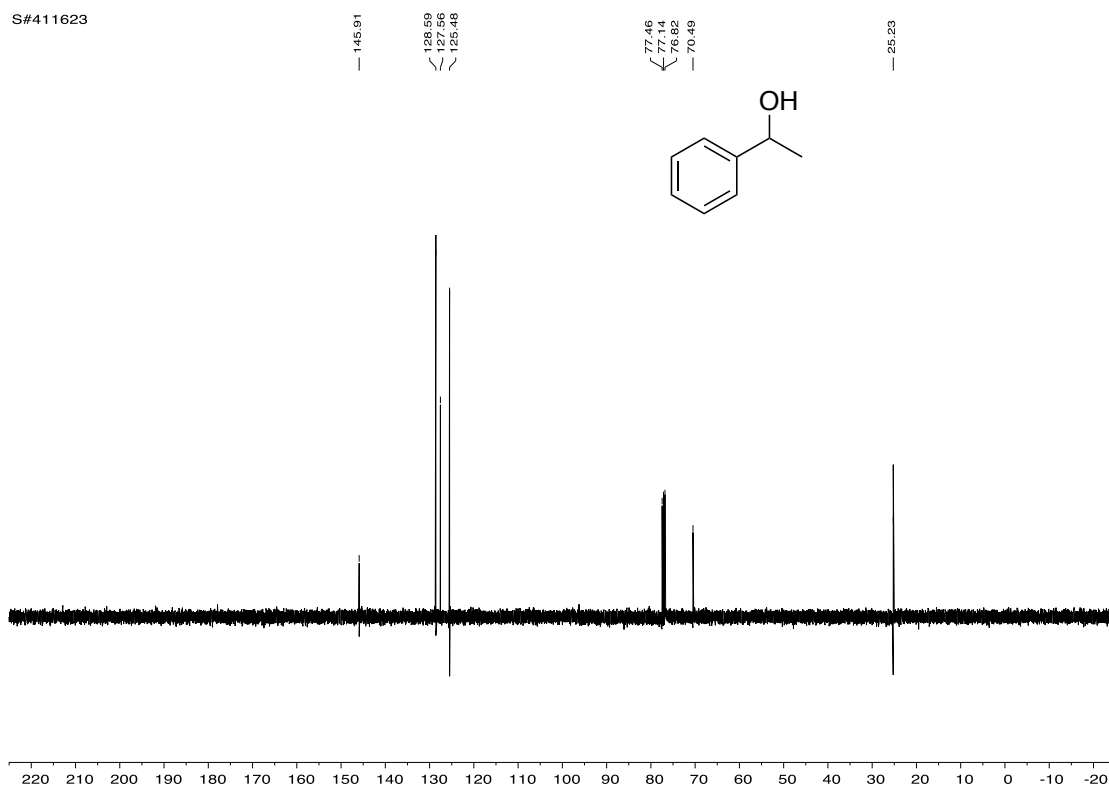

Appendix:  $^1\text{H}$ NMR and  $^{13}\text{C}$ NMR of **4**

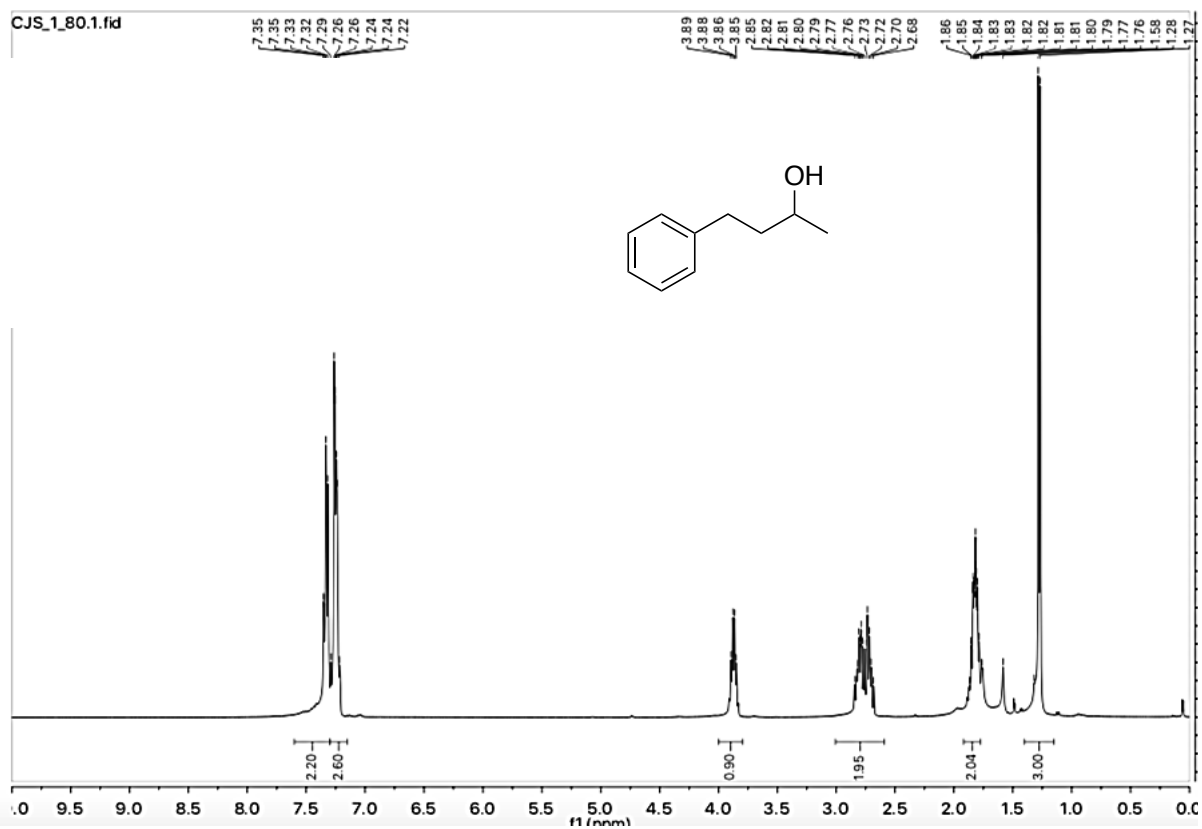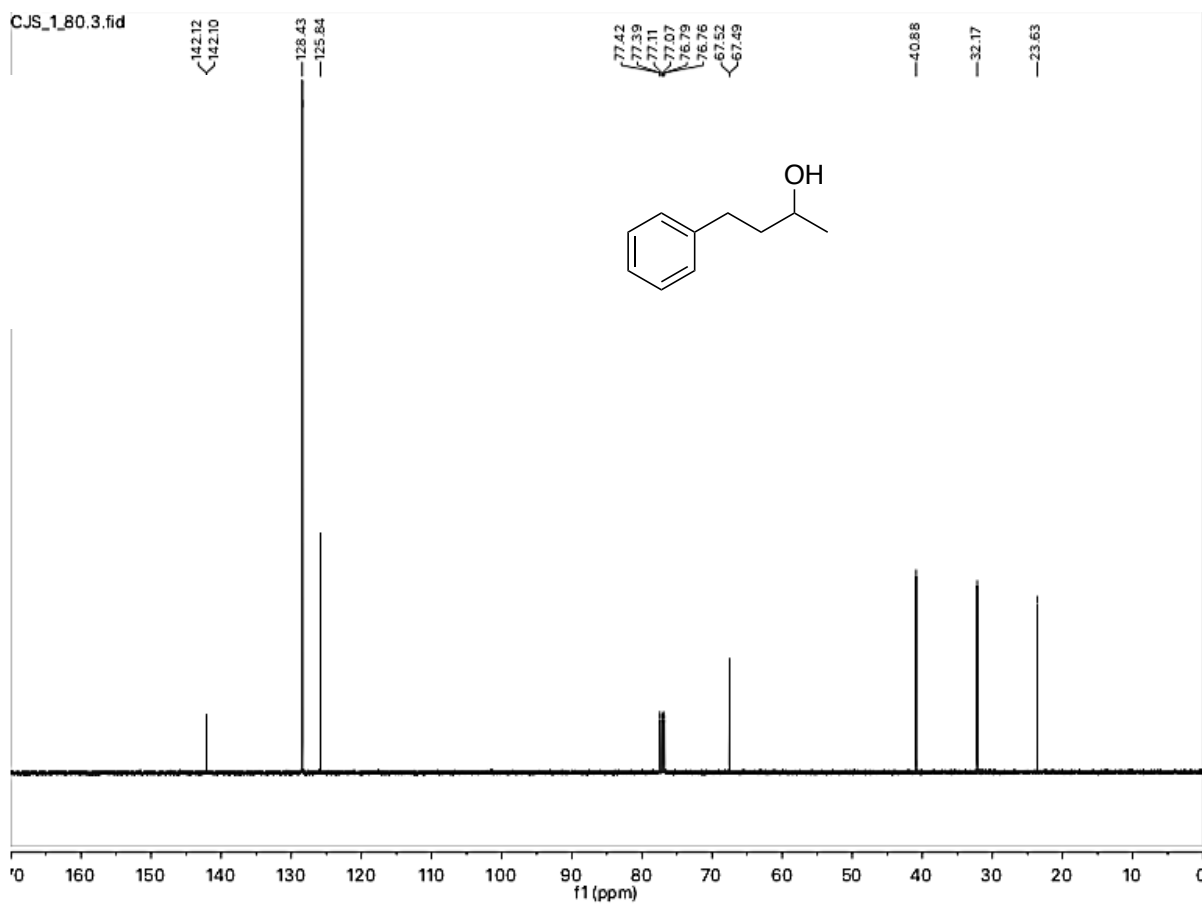

Appendix:  $^1\text{H}$ NMR and  $^{13}\text{C}$ NMR of 6

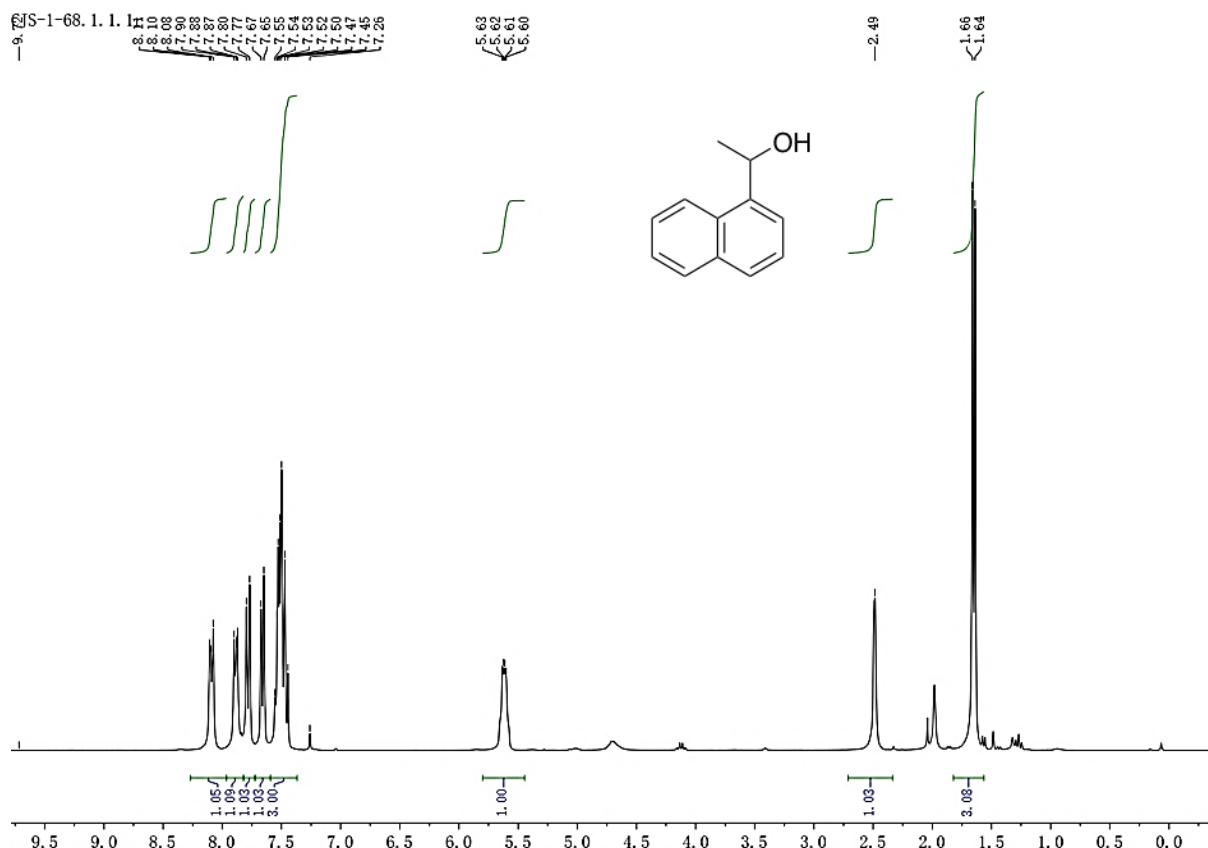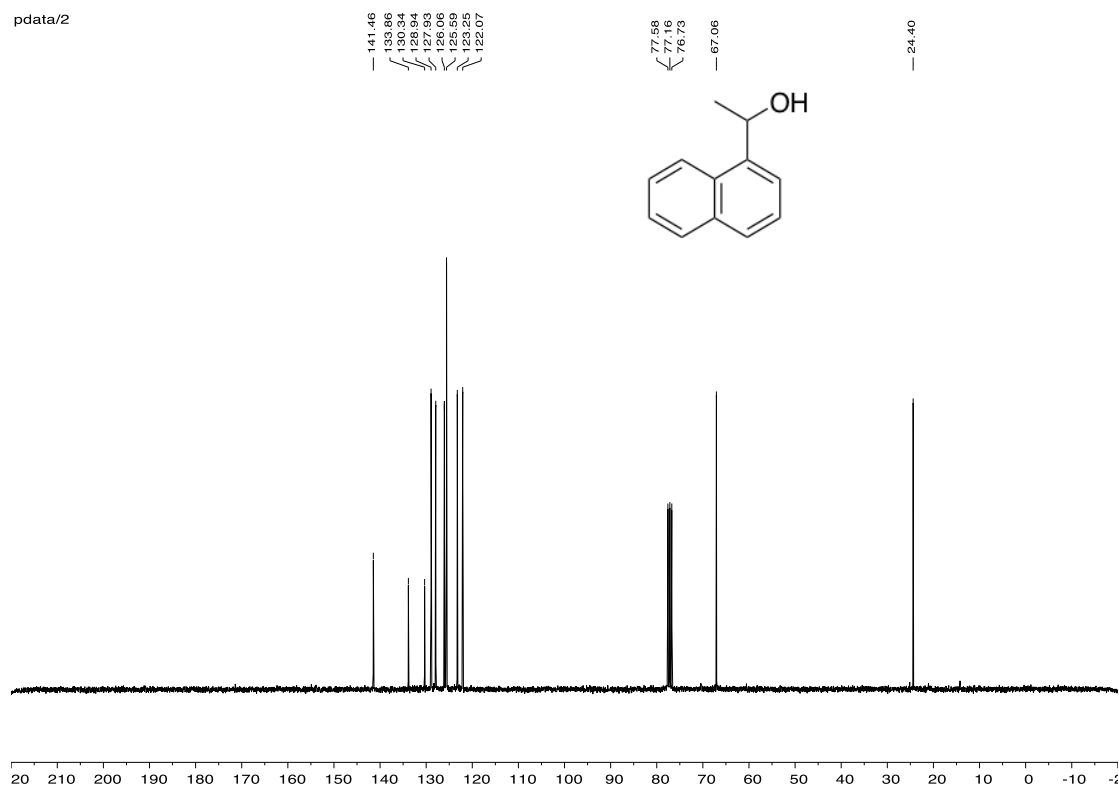

## Appendix: HPLC profiles of selected bioreductions of acetophenone 1

### Kred P1-A04, Native

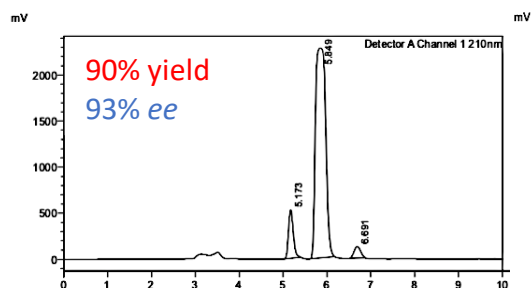

| Detector A Channel 1 210nm |           |          |         |
|----------------------------|-----------|----------|---------|
| Peak#                      | Ret. Time | Area     | Area%   |
| 1                          | 5.173     | 3993023  | 9.532   |
| 2                          | 5.849     | 36611008 | 87.393  |
| 3                          | 6.691     | 1288258  | 3.075   |
| Total                      |           | 41892290 | 100.000 |

### Kred P1-A04, BioBeads

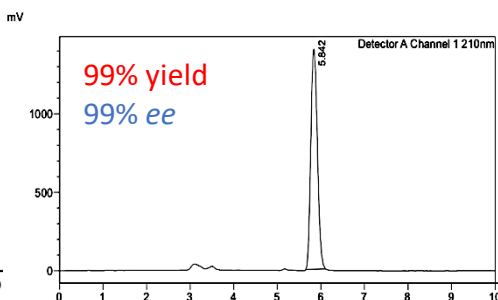

| Detector A Channel 1 210nm |           |          |         |
|----------------------------|-----------|----------|---------|
| Peak#                      | Ret. Time | Area     | Area%   |
| 1                          | 5.842     | 14792605 | 100.000 |
| Total                      |           | 14792605 | 100.000 |

### Kred P1-A04, Miniaturized

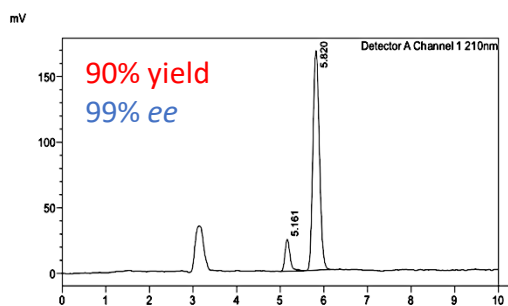

| Detector A Channel 1 210nm |           |         |         |
|----------------------------|-----------|---------|---------|
| Peak#                      | Ret. Time | Area    | Area%   |
| 1                          | 5.161     | 195290  | 10.190  |
| 2                          | 5.820     | 1721156 | 89.810  |
| Total                      |           | 1916446 | 100.000 |

### Kred P1-B10, Native

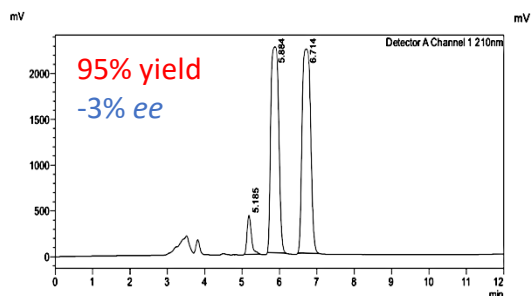

| Detector A Channel 1 210nm |           |          |         |
|----------------------------|-----------|----------|---------|
| Peak#                      | Ret. Time | Area     | Area%   |
| 1                          | 5.185     | 3432236  | 4.791   |
| 2                          | 5.884     | 33024642 | 46.094  |
| 3                          | 6.714     | 35189696 | 49.116  |
| Total                      |           | 71646574 | 100.000 |

### Kred P1-B10, BioBeads

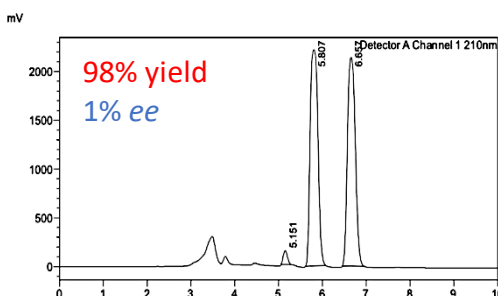

| Detector A Channel 1 210nm |           |          |         |
|----------------------------|-----------|----------|---------|
| Peak#                      | Ret. Time | Area     | Area%   |
| 1                          | 5.151     | 938935   | 1.705   |
| 2                          | 5.807     | 27432143 | 49.826  |
| 3                          | 6.657     | 26684483 | 48.468  |
| Total                      |           | 55055561 | 100.000 |

## Kred P1-B10, Miniaturized

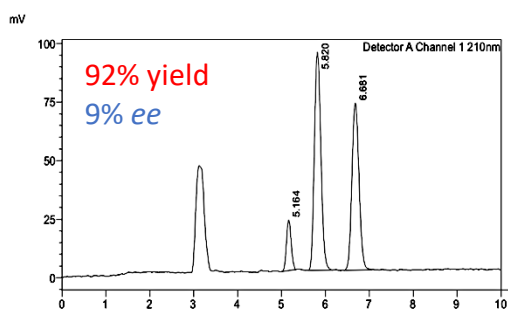

| Peak# | Ret. Time | Area    | Area%   |
|-------|-----------|---------|---------|
| 1     | 5.164     | 162006  | 8.416   |
| 2     | 5.820     | 962842  | 50.017  |
| 3     | 6.681     | 800192  | 41.568  |
| Total |           | 1925040 | 100.000 |

## References

- 1 Codexis Kred Screening Protocol available at [https://aed8ea31-545e-414a-b7fa7c34b1742e9a.filesusr.com/ugd/5a7b2a\\_b1bacad675224d368963598d77659fcc.pdf](https://aed8ea31-545e-414a-b7fa7c34b1742e9a.filesusr.com/ugd/5a7b2a_b1bacad675224d368963598d77659fcc.pdf) and [https://aed8ea31-545e-414a-b7fa-7c34b1742e9a.filesusr.com/ugd/5a7b2a\\_4fa7f9d02ec540e7b5db850ee1ca8f49.pdf](https://aed8ea31-545e-414a-b7fa-7c34b1742e9a.filesusr.com/ugd/5a7b2a_4fa7f9d02ec540e7b5db850ee1ca8f49.pdf)
- 2 Martin, M. C.; Goshu, G. M.; Hartnell, J. R.; Morris, C. D.; Wang, Y.; Tu, N. P., Versatile Methods to Dispense Submilligram Quantities of Solids Using Chemical-Coated Beads for High-Throughput Experimentation. *Org. Process Res. Dev* **2019**, *23* (9), 1900-1907.
- 3 Tu, N. P.; Dombrowski, A. W.; Goshu, G. M.; Vasudevan, A.; Djuric, S. W.; Wang, Y., High-Throughput Reaction Screening with Nanomoles of Solid Reagents Coated on Glass Beads. *Angew. Chem.Int.* **2019**, *58* (24), 7987-7991.
- 4 Cheng, Y. N.; Wu, H.; Wu P. Y.; Shen, Y. Y.; Uang, B. J.; Enantioselective addition of dialkylzincs to aldehydes catalyzed by (-)-MITH. *Chem. Asian J.* **2012**, *7* (12), 2921-2924.
- 5 R. A. Farrar-Tobar, Z. Wei, H. Jiao, S. Hinze, J. G. de Vries, Selective Base-free Transfer Hydrogenation of  $\alpha,\beta$ -Unsaturated Carbonyl Compounds using *i*PrOH or EtOH as Hydrogen Source *Chem. Eur.* **2018**, *24* (11), 2725-2734.
- 6 K. E. Jolley, Antonio Zanolli-Gerosa, F. Hancock, A. Dyke, D.M. Grainger, J.A. Medlock, H.G. Nedden, J. J. M. Le Paih, S. J. Roseblade, A. Seger, V.Sivakumar, I.Prokes, D.J. Morrisa and M.Wills, Application of tethered ruthenium catalysts to asymmetric hydrogenation of ketones, and the selective Hydrogenation of aldehydes. *Adv. Synth. Catal.* **2012**, *354*, 2545 - 2555
- 7 M. L. Kantam, S. Laha, J. Yadav, P. R. Likhari, B. Sreedhar, S. Jha, S. Bhargava, M. Udayakiran, B. Jagadeesh, An Efficient Copper-Aluminum Hydrotalcite Catalyst for Asymmetric Hydrosilation of Ketones at Room Temperature. *Org. Lett.* **2008**, *10* (14), 2979-2982.
- 8 Marx, L.; Rios-Lombardia, N.; Farnberger, J. F.; Kroutil, W.; Benitez-Mateos, A. I.; Lopez-Gallego, F.; Moris, F.; Gonzalez-Sabin, J.; Berglund, P., Chemoenzymatic Approaches to the Synthesis of the Calcimimetic Agent Cinacalcet Employing Transaminases and Ketoreductases. *Adv Synth Catal* **2018**, *360* (11), 2157-2165.
